# Supplementary material for: Pharmacogenomics, Race, and Treatment Outcome in Pediatric Acute Myeloid Leukemia
Source: PubMed Central journal article supplement (PMC11099689; doi:10.1001/jamanetworkopen.2024.11726), 2024-05-16
Supplement: jamanetwopen-e2411726-s001.pdf [file jamanetwopen-e2411726-s001.pdf]

## Supplementary Online Content

Lamba JK, Marrero R, Wu H, et al. Pharmacogenomics, race, and treatment outcome in pediatric acute myeloid leukemia. *JAMA Netw Open*. 2024;7(5):e2411726.

doi:10.1001/jamanetworkopen.2024.11726

**eTable.** Patient Characteristics by Race

**eFigure 1.** Event-Free Survival According to Race for Patients With (Top Curves) and Without (Lower Curves) Core Binding Factor Leukemia

**eFigure 2.** Event-Free Survival According to Race and ACS10 Score

This supplementary material has been provided by the authors to give readers additional information about their work.

**eTable 1. Patient Characteristics by Race**

|                        | <b>Total<br/>(N=515)</b> | <b>White<br/>(N=359)</b> | <b>Black<br/>(N=86)</b> | <b>Other*<br/>(N=70)</b> | <b>Black vs.<br/>White<br/>p value</b> |
|------------------------|--------------------------|--------------------------|-------------------------|--------------------------|----------------------------------------|
| <b>Age</b>             |                          |                          |                         |                          |                                        |
| Mean (SD)              | 9.07 (6.23)              | 9.13 (6.17)              | 8.76 (6.45)             | 9.12 (6.33)              | 0.63                                   |
| <b>Gender</b>          |                          |                          |                         |                          |                                        |
| Female                 | 229 (44.5%)              | 171 (47.5%)              | 33 (37.9%)              | 25 (36.8%)               | 0.12                                   |
| Male                   | 286 (55.5%)              | 189 (52.5%)              | 54 (62.1%)              | 43 (63.2%)               |                                        |
| <b>Initial Risk</b>    |                          |                          |                         |                          |                                        |
| Low                    | 126 (24.5%)              | 84 (23.3%)               | 27 (31.0%)              | 15 (22.1%)               | 0.16                                   |
| High                   | 192 (37.3%)              | 135 (37.5%)              | 32 (36.8%)              | 25 (36.8%)               | 1                                      |
| Standard               | 197 (38.3%)              | 141 (39.2%)              | 28 (32.2%)              | 28 (41.2%)               | 0.26                                   |
| <b>Cytogenetics</b>    |                          |                          |                         |                          |                                        |
| 11q23 rearrangements   | 130 (25.2%)              | 96 (26.7%)               | 17 (19.5%)              | 17 (25.0%)               | 0.21                                   |
| Normal                 | 104 (20.2%)              | 77 (21.4%)               | 16 (18.4%)              | 11 (16.2%)               | 0.66                                   |
| Other                  | 172 (33.4%)              | 117 (32.5%)              | 28 (32.2%)              | 27 (39.7%)               | 1                                      |
| t(8;21)                | 60 (11.7%)               | 35 (9.7%)                | 13 (14.9%)              | 12 (17.6%)               | 0.17                                   |
| Inv(16)                | 49 (9.5%)                | 35 (9.7%)                | 13 (14.9%)              | 1 (1.5%)                 | 0.17                                   |
| <b>CBF vs non CBF</b>  |                          |                          |                         |                          |                                        |
| CBF                    | 109 (21%)                | 72 (19.4%)               | 27 (29.9%)              | 13 (19.1%)               | <b>0.04</b>                            |
| Other                  | 406 (79%)                | 287 (80.6%)              | 59 (70.1%)              | 55 (80.9%)               |                                        |
| <b>Leukocyte count</b> |                          |                          |                         |                          |                                        |
| Mean (SD)              | 54.2 (89.5)              | 54.4 (91.8)              | 52.6 (74.0)             | 55.0 (96.8)              | 0.23                                   |
| <b>Treatment arm</b>   |                          |                          |                         |                          |                                        |
| HD-ADE                 | 269 (52.2%)              | 195 (54.2%)              | 43 (49.4%)              | 31 (45.6%)               | 0.48                                   |
| Clo/Ara-C              | 129 (25.0%)              | 81 (22.5%)               | 22 (25.3%)              | 26 (38.2%)               | 0.57                                   |
| LD-ADE                 | 117 (22.7%)              | 84 (23.3%)               | 22 (25.3%)              | 11 (16.2%)               | 0.68                                   |
| <b>Clinical Trial</b>  |                          |                          |                         |                          |                                        |
| AML02                  | 230 (44.7%)              | 160 (44.7%)              | 43 (50.6%)              | 27 (36.8%)               | 0.34                                   |
| AML08                  | 285 (55.3%)              | 199 (55.3%)              | 43 (49.4%)              | 43 (63.2%)               |                                        |

\*Other includes American Indian or Alaska Native, Asian, Native Hawaiian or Other Pacific Islander, or unknown  
SD, standard deviation; CBF, core binding factor

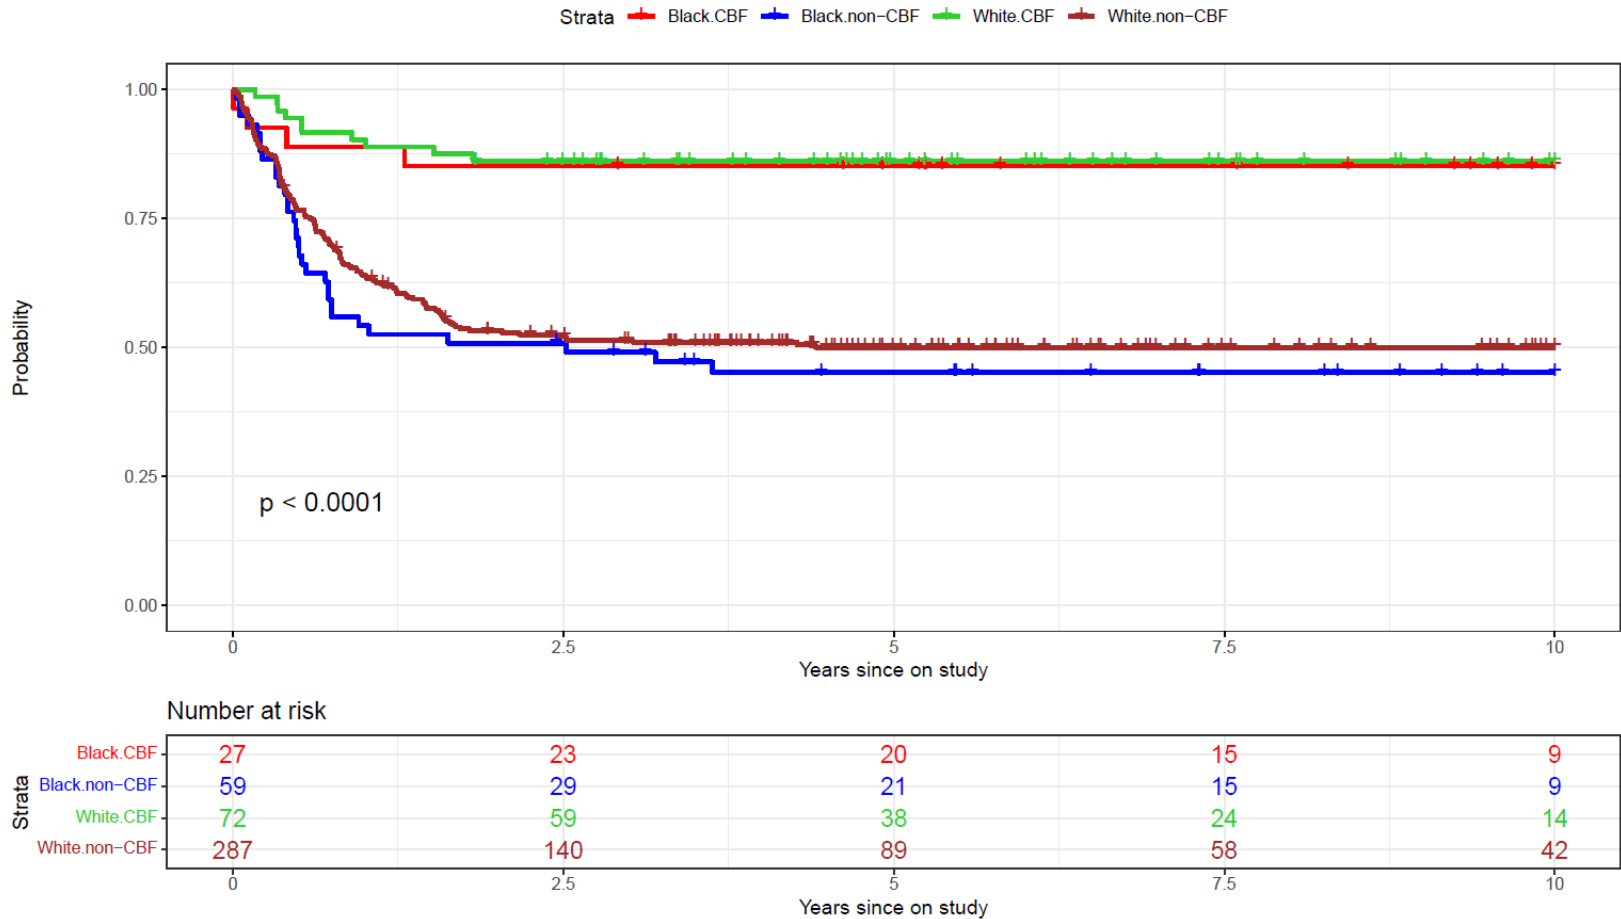

**eFigure 1.** Event-Free Survival According to Race for Patients With (Top Curves) and Without (Lower Curves) Core Binding Factor Leukemia

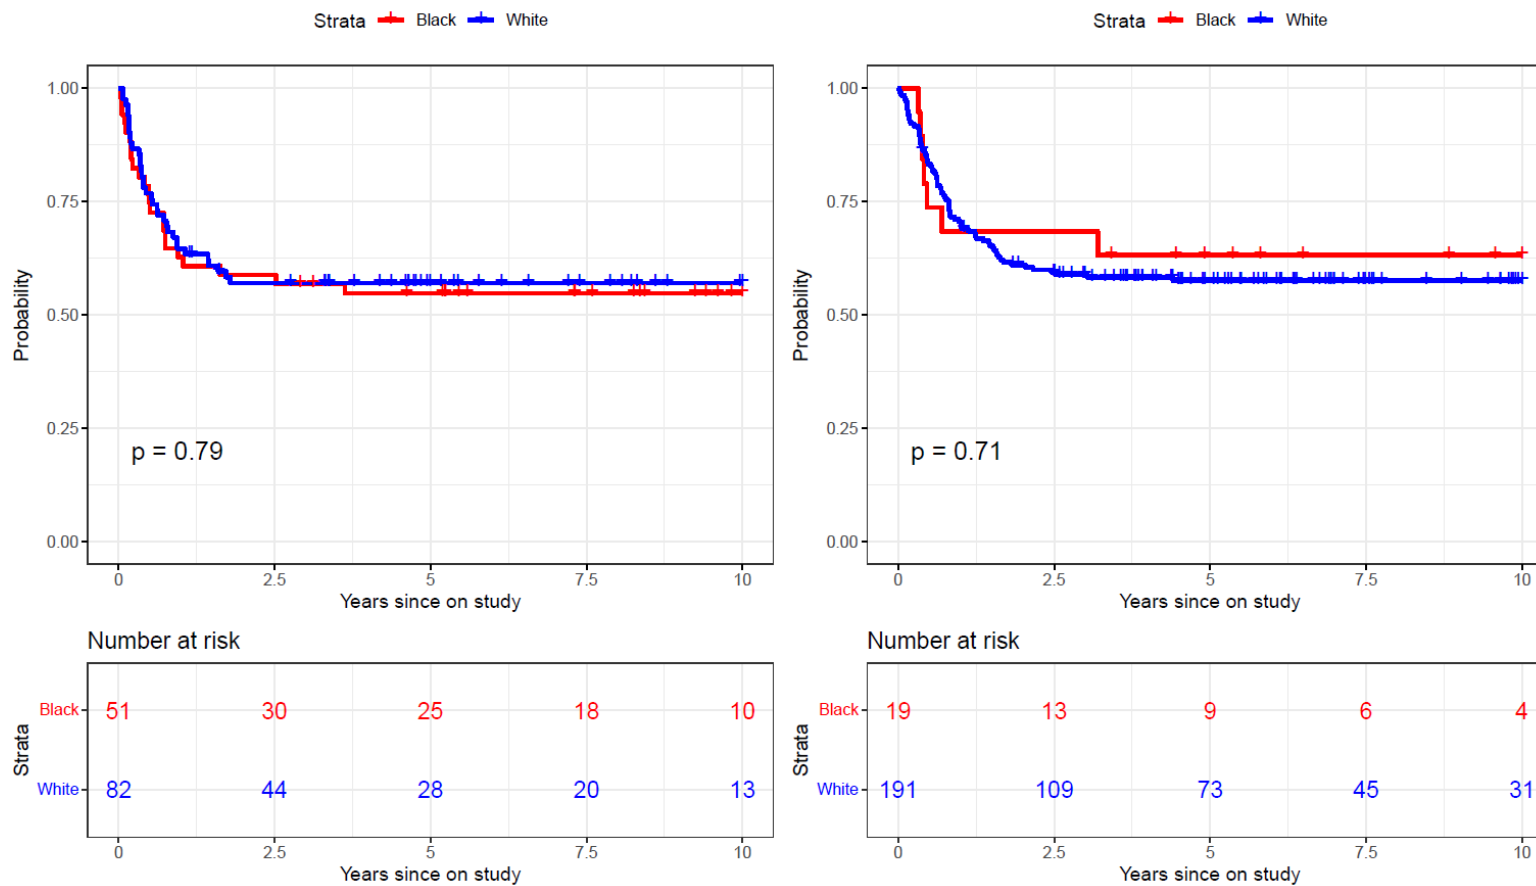

**eFigure 2.** Event-Free Survival According to Race and ACS10 Score. Left panel: Event-free survival in patients with low ACS10 scores. Right panel: Event-free survival in patients with high ACS10 scores.
