# Supplementary material for: Pharmacogenomics, Race, and Treatment Outcome in Pediatric Acute Myeloid Leukemia
Source: PubMed Central journal article supplement (PMC11099689; doi:10.1001/jamanetworkopen.2024.11726), 2024-05-16
Supplement: jamanetwopen-e2411726-s002.pdf [file jamanetwopen-e2411726-s002.pdf]

## Data Sharing Statement

Lamba. Pharmacogenomics, Race, and Treatment Outcome in Pediatric Acute Myeloid Leukemia. *JAMA Netw Open*. Published May 16, 2024.

doi:10.1001/jamanetworkopen.2024.11726

### Data

**Data available:** Yes

**Data types:** Deidentified participant data

**How to access data:** Deidentified individual participant data will be made available at the time of publication for a period of 5 years after the publication date. Proposals for access should be sent to [Jeffrey.rubnitz@stjude.org](mailto:Jeffrey.rubnitz@stjude.org).

**When available:** With publication

### Supporting Documents

**Document types:** None

### Additional Information

**Who can access the data:** Anyone requesting the data

**Types of analyses:** Any purpose

**Mechanisms of data availability:** With a signed data access agreement
